# Supplementary material
Source: publisher site journal article supplement (https://www.degruyter.com/publication/journal_key/TSD/downloadAsset/TSD_Instruction%20for%20Authors%20Tenside%20Surfactants%20Detergents.pdf)
Supplement: Supplementary file 1 [file TSD_Instruction%20for%20Authors%20Tenside%20Surfactants%20Detergents.pdf]

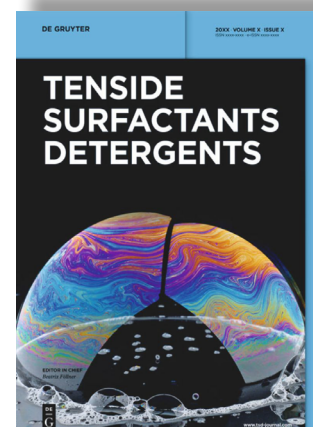

# Tenside Surfactants Detergents

## Table of Contents

|                                                                                                           |    |
|-----------------------------------------------------------------------------------------------------------|----|
| <b>Scope and general policies of the journal</b> .....                                                    | 2  |
| Scope.....                                                                                                | 2  |
| Article (manuscript) categories.....                                                                      | 2  |
| Submissions in the following fields are welcome.....                                                      | 2  |
| <b>Preparation of manuscript</b> .....                                                                    | 2  |
| Title page information.....                                                                               | 2  |
| Language.....                                                                                             | 3  |
| General format and manuscript elements.....                                                               | 3  |
| Abstract.....                                                                                             | 3  |
| Keywords.....                                                                                             | 3  |
| Headings.....                                                                                             | 4  |
| References.....                                                                                           | 4  |
| Figures and figure captions.....                                                                          | 4  |
| Tables and table captions.....                                                                            | 4  |
| Abbreviations.....                                                                                        | 5  |
| Italics and bold.....                                                                                     | 5  |
| Hyphens and dashes.....                                                                                   | 5  |
| Equations, formulae and symbols.....                                                                      | 5  |
| Scientific names and non-abbreviated Latin expressions.....                                               | 5  |
| Nomenclature.....                                                                                         | 5  |
| Units.....                                                                                                | 6  |
| Manufacturer details.....                                                                                 | 6  |
| Audio and Video.....                                                                                      | 6  |
| Supplementary material.....                                                                               | 6  |
| Author biography (bionotes).....                                                                          | 6  |
| <b>Peer review, turnaround times and preprint policies</b> .....                                          | 6  |
| Peer review information.....                                                                              | 6  |
| Turnaround time.....                                                                                      | 7  |
| Issue based publication.....                                                                              | 7  |
| Rejection of manuscripts.....                                                                             | 7  |
| Appeals.....                                                                                              | 7  |
| Preprint policy.....                                                                                      | 7  |
| Inclusive language policy.....                                                                            | 7  |
| <b>Submission of manuscripts</b> .....                                                                    | 7  |
| ORCID.....                                                                                                | 8  |
| Submission declaration and verification.....                                                              | 8  |
| Scientific misconduct.....                                                                                | 8  |
| Research integrity.....                                                                                   | 8  |
| <b>Post-acceptance</b> .....                                                                              | 9  |
| Galley proofs.....                                                                                        | 9  |
| Offprints.....                                                                                            | 9  |
| Repository policy.....                                                                                    | 9  |
| Copyright.....                                                                                            | 9  |
| Open Access in hybrid journals.....                                                                       | 9  |
| Article Processing Charges (APCs).....                                                                    | 9  |
| <b>Ethical conduct of research</b> .....                                                                  | 10 |
| Acknowledgments.....                                                                                      | 10 |
| Authorization for the use of human subjects – Research ethics.....                                        | 10 |
| Authorization for the use of experimental animals and wildlife in natural settings – Research ethics..... | 10 |
| Author contributions.....                                                                                 | 11 |
| Competing interests.....                                                                                  | 11 |
| Research funding.....                                                                                     | 11 |
| Data availability.....                                                                                    | 12 |

## Scope and general policies of the journal

### Scope

*Tenside Surfactants Detergents* offers the most recent results of research and development in all fields of surfactant chemistry, such as: synthesis, analysis, physicochemical properties, new types of surfactants, progress in production processes, application-related problems, and environmental behavior. Since 1964 *Tenside Surfactants Detergents* offers strictly peer-reviewed, high-quality articles by renowned specialists around the world. All articles are subject to thorough, independent peer review. The journal is aimed at scientists from industry, universities and research institutes who are actively involved in research work. The topics covered are:

- Physical chemistry of surfactants and surfactant mixtures in solutions and at interfaces
- Analytical chemistry and synthesis of surfactants
- Development of surfactants with special properties
- Production of surfactants from renewable/microbiological resources
- Novel “green” surfactants/biosurfactants
- Foams, gels, emulsions, microemulsions
- Application of surfactants in cleaning and body-care products, in pharmaceutical dosage forms, in agrochemicals and enhanced oil recovery
- Development of sustainable cleaning products and cleaning techniques
- Cleaning product safety and toxicology
- Hygiene requirements for cleaning and personal care products
- Consumer behavior in household cleaning
- Development of cleaning products performance test methods

*Tenside Surfactants Detergents* is the organ of the German Chemical Society (GDCh e.V.), Division “Chemie des Waschens”.

The journal publishes six issues per volume in print and online (Jan/Mar/May/Jul/Sep/Nov). The publication language is English.

### Article (manuscript) categories

- Original Article
- Review Article
- Short Communication
- Case Report
- Commentary
- Letter to the Editor

### Submissions in the following fields are welcome

- Surfactant chemistry
- Colloid and interface chemistry
- Surface chemistry
- Textile chemistry
- Environmental chemistry
- Detergent and cleaning agent production
- New developments in field of biosurfactants with focus on energy and resource saving and environmentally friendly production and application

## Preparation of manuscript

### Title page information

Please provide the following information on the first page of your manuscript during the submission process:

- Authors names

Write at least one given and family name in full. For all other names, initial is sufficient. List authors in the order

you want them to appear in the final version. Indicate the corresponding author by using an asterisk “\*” after the family name. Please list all authors who contributed to the manuscript and note that the addition of any author(s) after the submission of your manuscript is not permitted.

Author footnotes (superscript letters or numbers) to explain authorship details are not all allowed in the author line and will be converted to an author note on the first page. Kindly stick to the wording as in the examples below:

- [Full name author A] and [full name author B] contributed equally to this work.
- [Full name author A] and [full name author B] contributed equally to this work and share first authorship.
- [Full name author A] and [full name author B] share senior authorship.
- [Full name author A] and [full name author B] share first authorship.

- Title and short title

Provide a descriptive, concise and comprehensible main title as well as an abbreviated form of the main title (running head) with no more than 75 characters (including blanks). The short title will be displayed on the top of each page of the final version.

The article title and subtitle should be in sentence case. Use lowercase letters after colon.

- Affiliations

For the corresponding author supply the following details: e-mail address, department, institution, street, city, postal code and country; for all other authors department, institution, city, postal code and country are mandatory. Please also provide all details concerning the current institutional affiliation in case you changed affiliation during the manuscript preparation and publication process.

Supplying an ORCID is highly recommended (for more information and registration, please visit the ORCID webpage: <https://info.orcid.org/benefits-for-researchers/>)

- Please also indicate the character count, number of tables and figures, and whether your manuscript contains supplementary material.

## Language

All manuscripts must be written in clear and concise English. Both British and U.S. English are acceptable, but authors should be consistent in their usage. If you have reasons to doubt your proficiency with respect to spelling, grammar, etc. (e.g., because English is not your native language), then you may wish to employ – at your expense – the services of a professional language editor. Poorly written papers will be automatically returned for rewriting before review.

## General format and manuscript elements

Please use 12 pt font, single column full width text, double spaced lines, 2.5 cm margins and numbered pages – at the submission stage reviewers and editors need papers to be easy to read and annotate.

Please see the Manuscript checklist for detailed information on length and structure of specific article types.

### Abstract

Give a concise summary of your article in an abstract of approx. 250 words in a single paragraph. As abstracts are published separately by abstracting and indexing services, please spell out abbreviations at first use and do not include footnotes, tables, figures or equations. Avoid using references. If it is essential to use a reference in the abstract, please expand it as per journal reference style.

### Keywords

Keywords are used by abstracting and indexing services as well as search engines to facilitate finding your paper. Together with the abstract of your paper, they are a key tool enabling readers to find your paper and for increasing citations. Supply **3–6 specific keywords** in alphabetical order and lower case, separated by semicolon. These can be single words, but also short phrases representing the content. Make sure to select precise and concise keywords to your field or sub-field of research. Avoid abbreviations and the repetition of words already used in the article's title.

## Headings

Your manuscript should be subdivided into sections (and, if necessary, subsections). These sections should be labeled with headings in a consistent format and with a clear hierarchy of section headings. Limit your subsections to a maximum of four levels. For subdivided sections ensure that they have at least two subheadings on one level. Headings do not have an end period. Headings should be numbered and in sentence case. Use lowercase letters after colon.

## References

Please adhere strictly to the reference style of *Tenside Surfactants Detergents* as outlined in the [Reference Style Sheet](#). The style sheet provides examples for different types of citations in the text as well as for different bibliographic items in the reference list. Please note: All references mentioned in the reference list must be mentioned in the text, and vice versa.

## Figures and figure captions

Graphs, line drawings, photographs, schemes, diagrams, etc. may be used to illustrate your findings. Publication of color figures is provided free of charge in both online and print editions. The publication quality always depends directly on the quality and size of the delivered data.

Please label the illustrations as "Figure". Each figure should be uploaded separately as .jpg, .eps, .png or .tiff file. Images should have a minimum resolution of 300 dpi (color or black-white pixel graphics/half-tone images) in the intended size (600dpi combination of pixel graphic and line drawing, 1200dpi for line drawings). When drawing bar graphs, use patterning/color instead of grey scales (faint shading may be lost upon reproduction). Figures should not display any frames.

Figures should be numbered consecutively using Arabic numerals (from 1) throughout the text. If you include multi-part figures, please make sure to label all part figures by using lowercase letters in parentheses (e.g., (a)).

Please make sure that all figures are explicitly referred to in the text. Please include the figures in the text itself at the suitable position. However, the final position will be only determined during typesetting. Therefore, do not end the text immediately preceding the suggested positioning of a figure with a colon and avoid expressions such as "in Figure 1 below/above". Note that figures will usually be placed on the top or the bottom of the page in the final layout. Nevertheless, please upload each figure separately as a separate file with high-resolution.

Provide a concise and self-explanatory caption for each figure. In case of multi-part figures, please include a main caption as well as part figure captions. The main caption should be separated from the part figure captions by a colon, e.g., Figure 1: This is the main caption: (a) this is part figure caption a, (b) this is part figure caption b. When referring to particular figures, please use the capitalized full words: Figure 1.

The key to the symbols depicted in the figures should be included in the figure itself, where possible. Otherwise, include it in the caption. The caption itself should not be included in the figure.

Please make sure that letters, numbers, symbols, text, etc. included in the figure are clear, easy to read (not below 6 pt, preferably in Arial or Helvetica) and uniform in style. The style of labeling of the co-ordinates must be uniform for all drawings. The magnification must be indicated by a labeled scale marker on the micrograph itself, not drawn below it.

It is the authors' responsibility to use images that do not infringe on any copyrights, performing rights, trademark rights, personal rights or any other third-party rights or are otherwise unlawful. Copyright permissions can be obtained through the Copyright Clearance Center (<https://www.copyright.com/>).

## Tables and table captions

Number tables consecutively using Arabic numerals. Tables should be provided in an editable source format (Word, LaTeX). Please avoid handing in tables as image or Excel files.

Provide a short descriptive title, column heads, and (if necessary) footnotes to make each table self-explanatory. In column heads, separate units with a comma and use parentheses for additional measures (e.g., %, range, etc.). Use footnotes in alphabetical order (a, b, c, etc.) to give emphasis or further information. Expand abbreviations used in tables in footnotes.

In case bold type or italics are used to highlight information, please explain their meaning.

Avoid color, shading, vertical lines, and other cell borders. Note that most horizontal lines within the table body will be removed during the production process.

When referring to particular tables in the text, use the capitalized full words: Table 1. Please include the tables in the text itself at the suitable position. However, the final position will be only determined during typesetting. Therefore, do not end the text immediately preceding the suggested positioning of a table with a colon and avoid expressions such as "in Table 1 below/above", as the exact positioning of these elements cannot be determined

until after the manuscript has been typeset. Note that tables will usually be placed on the top or the bottom of the page in the final layout.

### Abbreviations

The use of abbreviations and acronyms is permitted given that they are expanded in full when used the first time with the abbreviation in parentheses (applies to abstract and main text). Please use them consistently thereafter. Whilst most abbreviations use upper case letters those for structures such as fcc, hcp etc. should be lower case and as with other abbreviations, no full stops between letters. Avoid using non-standard abbreviations unless they appear more than three times in the text. We recommend providing a list with an overview of all abbreviations.

### Italics and bold

Italicization should be used sparingly, if at all, and only then for *special emphasis* if this cannot be suitably achieved with words. Short Latin phrases (*in situ*, *in vivo*, *in vitro*, etc.) as well as longer words and phrases, e.g. medical or biological terms should be italic, whereas et al. should not. Brackets, mathematical symbols (including integral signs, differential d, partial differential  $\partial$ ,  $\Delta$ , etc.) and abbreviations such as L for liquid or c for critical should not be italic. Symbols with a value should be italic, e.g.  $\pi$ ,  $\sigma$  (stress),  $\theta$  (XRD Bragg angle),  $E$  (Young's modulus),  $T$  (temperature) etc. Subscripts and superscripts used to qualify symbols follow the same rules, e.g.  $T_m$  for melting temperature. If a character needs to be italic it should be italic whenever it is used whether in equations, text, figures or tables. Bold text should be reserved for main headings, vectors and tensors.

### Hyphens and dashes

When connecting words use a hyphen if the first word qualifies the second, a longer dash if the words are simply being linked, e.g. stress-induced transformation (hyphen), stress–strain curve (this symbol is called an “en dash” and should be used wherever a long dash is required); specific compositions use a hyphen, e.g. Hf-12Si (wt.%) whilst general systems use a dash, e.g. Hf–Si phase diagram. Quantity ranges and terms involving two different names should use an en dash, e.g. (600–750) K, Hall–Petch equation.

### Equations, formulae and symbols

Equations should be well-aligned and not crowded. Use only Latin and Greek alphabets. For MS Word submissions create equations using the Microsoft equation editor or a corresponding add-on. Do not submit math equations as images, but as editable text. Number displayed equations and formulae consecutively with Arabic numerals in parentheses (if referred to in the text). Extended roots should be written in parentheses with fraction exponents, and exponential functions should exclusively have the format  $\exp(\dots)$ .

### Scientific names and non-abbreviated Latin expressions

Gene acronyms, alleles, genus, species, and non-abbreviated Latin expressions should be written in italic font type.

Capitalize the first letter of the genus, but not the species. Format all binomial names in italics. After the first use, genus names should be abbreviated to a first initial. For genus names starting with the same letter differentiate by including the second letter.

‘sp.’, ‘spp.’, ‘ssp.’, ‘var.’, ‘L.’, ‘subsp.’, etc. should be Roman.

### Nomenclature

Chemical nomenclature should be consistent with the practice of Chemical Abstracts (see “Index Guide,” 1977, and “Supplement,” 1977–1979). Trivial names often are shorter and more commonly understood, but they may be used only after being introduced together with the systematic names.

Chemical formulae and names must be unambiguous and in accordance with the relevant international recommendations, cf. IUPAC (1993) Quantities, Units and Symbols in Physical Chemistry, 2nd ed., Blackwell Scientific, Oxford and ISO (1993) International Vocabulary of Basic and General Terms in Metrology, Geneva.

Trade names should be avoided: abbreviations and uncommon symbols should be explained at first mention. There may be, however, exceptions such as Span™ or Tween™, which should be explained. If proprietary substances, materials and instruments are mentioned, the correct designation and the manufacturer's name should be given. Where the manufacturer is not well known, the address should also be included.

Enzymes should be identified by the name and EC number recommended by the Enzyme Commission. EC numbers should be given on first mention in the abstract and in the text. Enzyme Nomenclature, Recommendations (1992) of the IUPAC-IUB is available from Academic Press, New York and London.



**Units**

SI units must be used throughout unless a non-SI unit is commonly accepted or is clearer, e.g. temperatures can be in °C (always use a proper degree sign) although heating/cooling rates and temperature differences are always in K (for more information, please visit <https://www.bipm.org/en/home>). Use  $\text{J m}^{-2}$  instead of  $\text{J/m}^2$  and use a thin space, i.e.  $\text{J m}^{-2}$ . Always use a non-breaking space (Unicode U+202F) between the number and the unit, e.g. 5 %, 600 K,  $27 \text{ m s}^{-1}$  etc. Compositions expressed as percentages should clearly indicate the basis used, i.e. at.%, wt.%, mol.% or vol.%. Note the separation by full stop only; spaces are used to separate the composition, e.g. 5 wt.% Surfactant A.

Make sure that decimal fractions use a decimal point not a comma, i.e. 3.1415 not 3,1415. Powers of 10 should be indicated by 10x not 1 E x; thousands should be separated by a comma: 100,000.

**Manufacturer details**

For all products used (such as reagents and apparatus), please try to supply the manufacturer name, city, (state abbreviation, if applicable), country.

E.g., Cobas® EGFR Mutation Test CE-IVD (Roche Molecular Systems, Pleasanton, CA, USA)

**Audio and Video**

For all examples connected to an audio/video recording, supply audio/video clips. Deliver these clips as separate files and do not integrate them directly into the manuscript.

Name all your clips using the following convention:

e.g., audio-1-smith.MP3, video-1-smith.MP4,

[media]-[identifier]-[author-family-name].[extension]

Indicate the position in the article by placing a marker as follows:

[associated audio-1-smith.wav with example (1)]

Provide a short caption for each media file and number them consecutively. Any other media files can be included as part of the supplementary material.

File naming: audiosupplement-1-smith.MP3,

[media.supplement]-[identifier]-[author-family-name].[extension]

The following formats are preferred: audio files in MP3 (at least 16 bit) and video files in MP4 (at least a height of 480 pixels and a frame rate of 25). However, other common formats are also permitted.

**Supplementary material**

Supplementary material which may offer further information on your work but does not belong to the core part of the article, will not be part of the typeset article PDF. The material will be made available as a separate download in the online version of the article. Supplementary material may contain questionnaires for discussed surveys, protocols, code samples, datasets, extensive tables, additional figures, multimedia files (audio, video, animations), etc. If the manuscript is accepted, supplementary material will be referenced in the print version, but will be published online only.

Please provide supplementary material data as separate file(s) of no more than 10 MB per file during submission. Note that the material should be publication-ready (not in track-changes mode), as it will not be typeset, but published exactly as supplied. Within the text, the supplementary material must be cited consecutively and be referred to as supplementary material data (e.g., see Supplementary Material, Fig. 1, or Figure S1, Table S1, etc.).

**Author biography (bionotes)**

Provide a brief biography (max. 80 words) including, e.g., your qualifications, awards won, membership of professional societies, and highlighting your expertise/research interests related to the article's topic. Submit the biographies as a separate file. For articles with more than five authors, bionotes are restricted to five.

**Peer review, turnaround times and preprint policies****Peer review information**

*Tenside Surfactants Detergents* is a single-blind journal. Manuscripts are reviewed by at least one independent reviewer selected by the Editor. The authors may suggest up to four potential reviewers for their manuscript, given that they provide the names, academic degrees, institutions, country and their professional e-mail addresses. Reviewers indicated by the authors must be of institutions different from those of any of the authors. Authors may also provide names of reviewers they wish to exclude from reviewing their manuscripts.

The editors reserve the right to reject submitted manuscripts without peer review if the studies are not novel or important enough to merit publication in the journal. Manuscripts deemed unsuitable (insufficient originality or limited interest to the target audience) will be also rejected without review.

### **Turnaround time**

*Tenside Surfactants Detergents* aspires to inform authors of the peer review decision within 4 weeks from submission date. Revised manuscripts should be returned within 3–6 weeks. After the final acceptance of the manuscript by the EiC, manuscripts are forwarded to production and will be published online within 4–6 weeks of acceptance.

### **Issue based publication**

Generally, articles are first published online as DOI citable articles and are later assigned to an issue with final page numbers.

### **Rejection of manuscripts**

Manuscripts dealing with subjects that have been well studied in the literature, and that do not resolve questions raised by previous studies, or manuscripts that are statistically underpowered, are likely to be rejected without peer review.

Reporting of negative results must be justified by prior evidence that a positive result would be expected. Manuscripts are also returned to authors if they do not comply with the Instructions for Authors.

### **Appeals**

Manuscripts that have been rejected for publication will be reconsidered only at the discretion of the Editor. Authors wishing to request reconsideration of a previously rejected manuscript must do so in written form and submit a rebuttal by e-mail to the journal's editorial office. Authors should provide detailed reasons why they believe the manuscript should be reconsidered. If the rebuttal is accepted, the author will be asked to re-submit the manuscript.

### **Preprint policy**

De Gruyter does not consider the following purposes of a paper as pre-publication: publication in the form of a congress abstract, publication as an academic thesis, publication as an electronic preprint on recognized servers such as arXiv, RePEc, bioRxiv, ResearchSquare, etc.

### **Inclusive language policy**

Inclusive language recognizes diversity, conveys respect for all people, is sensitive to differences and promotes equal opportunities. Content should not make assumptions about readers' beliefs or commitments; should not contain anything that might suggest that one person is superior to another because of age, gender, race, ethnicity, culture, sexual orientation, disability or health condition; and should use inclusive language throughout. Authors should ensure that their writing is free from prejudice, stereotypes, slang, references to the dominant culture and/or cultural assumptions.

We advise the following approach: Aim for gender neutrality by using plural nouns (clinicians, clients, participants) as standard and avoiding "he" or "she", wherever possible. Instead, please use "they". We recommend avoiding the use of descriptors that refer to personal characteristics such as age, gender, race, ethnicity, culture, sexual orientation, disability or health status unless they are relevant and valid.

### **Submission of manuscripts**

Please submit manuscripts exclusively online at: <https://www.editorialmanager.com/tsd/>

You will be guided through the whole submission process.

In Editorial Manager, the submitting and contact author is called corresponding author.

A pdf file will be created at the end of the submission process. Please view and approve it to submit your manuscript to the Editorial Office. We recommend using the latest version of Adobe Reader.

Authors, who have difficulties using the on-line submission system, should contact the Editorial Office:

Dr. Beatrix Föllner  
Am Kreuzberg 5  
41334 Nettetal  
Germany  
Tel. +49 2153 952540  
Fax. +49 2153 952541  
tenside@degruyter.com

We strongly recommend the authors register with institutional e-mail addresses, and refrain from using private e-mail addresses. Revised manuscripts must be accompanied by a point-by-point reply to the reviewers' criticisms. Major changes in the revised manuscript must be highlighted, preferably in tracked changes mode. A second, clean version should always be submitted for major changes.

### ORCID

The ORCID (Open Researcher and Contributor ID) is a non-profit, publisher-independent system that is used to uniquely identify academics and their publications. Click [here](#) for detailed information about ORCID. Providing an ORCID number for each author is strongly recommended. ORCID numbers should be listed on the title page.

### Submission declaration and verification

For information on plagiarism, please refer to [COPE – Committee of Publication Ethics](#). Submission of a manuscript to a journal implies that the work described has not been published previously, except in the form of an abstract, academic thesis, lecture, or preprint; that it is not under consideration for publication elsewhere (multiple, redundant, concurrent publication); that publication of the work is approved by all authors and tacitly or explicitly by the responsible authorities where the work was carried out; and that, if accepted for publication, it will not be published elsewhere in any other language, without the written consent of the Publisher. Exceptions are listed under Preprint policy.

To exclude potential overlap with prior publication(s), your manuscript may be checked by the plagiarism checker Crossref Similarity Check ([iThenticate](#)). Previously published material must be referenced appropriately in the manuscript, regardless of whether the material was previously published in a subscription based, hybrid or open access journal, or in another language.

### Scientific misconduct

Only articles that have not been or will not be published elsewhere will be published in the journal, excluding articles that fall under De Gruyter's [Repository Policy](#). Multiple submissions/publications or redundant publications (i.e., republication of data already published by the same authors) will be rejected. If identified after publication, the journal reserves the right to publish a retraction note. In any case, the EiC will follow COPE's Code of Conduct and implement its advice.

### Research integrity

The authors are responsible for all aspects of the study and will ensure that any questions regarding the accuracy and integrity of any part of the work are adequately investigated and resolved. With submitting your manuscript to *Tenside Surfactants Detergents* the authors declare that they are the sole and intellectual authors of the manuscript. Please list all authors who contributed to the manuscript and note that the addition of any author(s) after the submission of your manuscript is not permitted. We do not accept submissions that name Artificial Intelligence (AI) and/or Machine Learning Tools as credited author(s) on a manuscript because such tools cannot take responsibility for the submitted work and therefore cannot be considered as eligible authors. Where such tools or technologies are used as part of the design or methodology of a research study, their use should be clearly described in the Acknowledgments section. In case of doubt, the Editorial Board reserves the right to ask the authors to submit the raw experimental data.



## Post-acceptance

### Galley proofs

The corresponding author of an article receives the galley proofs in electronic form to check them for editorial and typesetting accuracy. Corresponding authors receive an e-mail notification ("Check your proof") with a link to the author's page. Here they can download the PDF proof. As soon as the corrections and answers to comments are marked in the PDF file, the author uploads the proof file to the same page and submits it to production. All instructions for proof corrections, including deadlines, will be given in the e-mail notification to the corresponding author, along with a user guide, providing step-by-step instructions for inserting corrections. Please note that the proofreading e-mail will be sent from [noreply@degruyter.com](mailto:noreply@degruyter.com). Kindly check your spam folder as well.

Substantial changes to an article accepted for publication will only be considered with the permission of the Editor or after additional peer review. The responsibility for proofreading lies solely with the authors. **According to De Gruyter policy, once an article has been accepted, no changes to the author list and article title are allowed (except typos). The De Gruyter production team is instructed to enforce this policy during the production/proof correction process.**

### Offprints

Electronic files of typeset articles in Adobe Acrobat PDF format are provided free of charge. The corresponding author will receive an e-mail notification when the article has been published online along with instructions on how to access the article.

### Repository policy

Authors may publish their articles in a public repository after an embargo period of 12 months (see De Gruyter's [Sharing Policy](#)). Only the accepted author version of the manuscript, not the PDF version of the published article, can be published:

Immediately

- via their non-commercial personal website, blog or social media channels
- by updating a preprint in arXiv, RePEc, bioRxiv, ResearchSquare, etc. with the version of the accepted manuscript
- as a closed deposit via their research institute or institutional repository for internal institutional purposes or as part of an invitation-only research collaboration workgroup
- directly by providing copies to their students or to research collaborators for their personal use
- for private scholarly sharing as part of an invitation-only work group

After an embargo period of 12 months

- as open deposits to institutional or subject repositories
- to scholarly collaboration networks (SCNs)

### Copyright

Manuscripts submitted to subscription and hybrid journals are accepted on condition of transfer of copyright ([License to Publish](#)) (for U.S. government employees: to the extent transferable) to the publisher. Once the manuscript has been accepted, it may not be published elsewhere without the consent of the copyright holders.

### Open Access in hybrid journals

The author declares consent to place the article under the Creative Commons license CC-BY 4.0. In this case, the exclusive rights previously granted to the publisher will be converted into non-exclusive rights. The author confirms that they have already acquired all necessary rights for all components of the work in the event of an open access publication. For more information, refer to paragraph 5 in the [License to Publish](#).

### Article Processing Charges (APCs)

There are **NO** APCs due for publication in *Tenside Surfactants Detergents*. Authors publishing in **hybrid journals** do not have to pay APCs if they do not wish to publish their article open access. After acceptance and before production of an article, authors can decide whether to publish their article open access. Only if they decide to

publish open access, APCs will be charged. All articles are peer-reviewed and accepted for publication based on the quality of their scientific contribution. The decision to publish open access does not affect the peer review process or the acceptance of the article. De Gruyter has [institutional agreements](#) in place that allow authors to publish open access articles at no cost at all – or with a significant discount. For more information on De Gruyter's open access policy, please read our [Open Access Policies](#).

## Ethical conduct of research

**Manuscripts must follow certain ethical guidelines** to be considered for publication. These can generally be found in the [Publication Ethics and Malpractice Statement](#). Accordingly, **before submitting your manuscript, please make sure that you and your co-authors agree to the applicable requirements**. For example, this may involve declaring and ruling out conflicts of interest or proving compliance with legal requirements related to human and animal testing.

Furthermore, our [Code of Conduct for Publication Procedures and Ethics](#) defines the responsibility of De Gruyter as a publisher and the Editors we work with, to ensure the legitimacy and quality of our published research. Our principles are based on the guidelines of the [Committee on Publication Ethics \(COPE\)](#).

## Acknowledgments

Authors may wish to acknowledge individuals, working groups, institutions, etc. who provided help and support (other than financial) during research and the preparation of the manuscript (e.g., language checking, writing assistance or proof reading of the article, etc.). Individuals acknowledged are not included on the title page, as a footnote to the title or otherwise.

We do not accept submissions that name Artificial Intelligence (AI) and/or Machine Learning Tools as credited author(s) on a manuscript because such tools cannot take responsibility for the submitted work and therefore cannot be considered as eligible authors. Where such tools or technologies are used as part of the design or methodology of a research study, their use should be clearly described in the Acknowledgments section.

## Authorization for the use of human subjects – Research ethics

Manuscripts that contain information on the use of humans should clearly state that the research complies with all relevant national regulations and institutional policies and has been approved by the authors' Institutional Review Board or any equivalent Committee. The Editors reserve the right to seek additional information or guidance from reviewers on any cases in which concerns arise. All investigations with human subjects must be conducted by following the tenets of the [Declaration of Helsinki](#), what is more authors must identify the Committee or Institutional Review Board approving the experiments, and provide a statement indicating approval of the research. If applicable, information on research ethics and/or approval by the Institutional Review Board should be given in the Methods section.

If required for submission, submit the “[Template for Ethical and Legal Declarations](#)” file that asks you to comment on Research Ethics. Provide the same information here. Make sure that the information in the manuscript matches the information in the template.

## Authorization for the use of experimental animals and wildlife in natural settings – Research ethics

Manuscripts that contain information on the use of animals should clearly state that the research has complied with all relevant national regulations and institutional policies and has been approved by the authors' Institutional Review Board or any equivalent Committee. The Editors reserve the right to seek additional information or guidance from reviewers on any cases in which concerns arise. The research using animal subjects should be conducted according to the Principles of Laboratory Animal Care and similar documents (e.g. [NIH](#)). For manuscripts reporting experiments on live vertebrates or higher invertebrates, authors must identify the Committee approving the experiments, and must confirm that all experiments were performed in accordance with relevant regulations. If applicable, information on research ethics and/or approval by the Institutional Review Board should be given in the Methods section.

If required for submission, submit the “[Template for Ethical and Legal Declarations](#)” file that asks you to comment on Research Ethics. Provide the same information here. Make sure that the information in the manuscript matches the information in the template.

For research involving wildlife in natural settings, authors must have obtained an Institutional Animal Care approval and state that they have complied with the relevant national, international, and institutional guidelines regarding the ethical treatment of the taxa of study and cite them.

If a study did not require human or animal ethical approval, a corresponding statement should be given in the Methods section. If required for submission, submit the “[Template for Ethical and Legal Declarations](#)” file provide the same information here, or *Not applicable*.

### Author contributions

In view of research integrity, authorship is generally confined to an individual who has made a substantial intellectual or practical contribution to the conception or design of the project or the acquisition, analysis, or interpretation of data for the work of a publication and/or has drafted the work or reviewed/revised it critically for important intellectual content. The individual(s) listed as author(s) must agree to be accountable for said contribution and approve of the final version. **Honorary authorship is not allowed.**

Individuals who helped or participated in certain substantive aspects of the project or work (e.g., technical services staff), but whose contributions were not of sufficient extent to be listed as co-authors, should be appropriately acknowledged, usually in an Acknowledgements section.

Authors must declare their responsibility for the entire content of the manuscript and may indicate the individual contributions of each author, if applicable. The author contribution statement should appear on the title page before the Reference section as the following default statement: *All authors have accepted responsibility for the entire content of this manuscript and approved its submission.* or *The author has accepted responsibility for the entire content of this manuscript and approved its submission.*

If required for submission, submit the “[Template for Ethical and Legal Declarations](#)” file that asks you to comment on Author Contribution. Provide the same information here as in the manuscript. Make sure that the information in the manuscript matches the information in the template.

### Competing interests

A conflict of interest for a particular manuscript exists when a participant in the peer review and publication process – author, reviewer, and Editor – has ties to activities that could inappropriately influence his or her judgment, regardless of whether the judgment is actually affected. Financial relationships with industry (for example, employment, consultancies, stock ownership, honoraria, patent applications, expert testimony, grants and other funding), either directly or through immediate family, are usually considered the most important conflicts of interest. However, conflicts can occur for other reasons, such as financial support of the study, ties to health insurance, politics or other stakeholders, personal relationships, academic competition, and intellectual passion. To ensure fair and objective decision-making, authors must declare any associations that pose a conflict of interest (financial, personal or professional) in connection with the manuscript under evaluation. This must be declared during the submission process and also at the end of the manuscript. If you do not have a statement to make, please insert *None declared*. The conflict-of-interest statement should appear on the title page of double-blinded journals, and before the Reference section of single-blinded journals. If applicable, submit a file called “[Template for Ethical and Legal Declarations](#)” that asks you to comment on the Competing interests. Provide the same information here as in the manuscript. Make sure that the information in the manuscript matches the information in the template.

If you do not have a statement to make, the default statement will be set in place: *The authors state no conflict of interest.*

### Research funding

Funding sources should be listed at the end of the manuscript, before the References and/or indicated in the “[Template for Ethical and Legal Declarations](#)”, if required for submission, after Research Funding. When the study benefitted from funding through an unrestricted grant or other resources provided to a university, college,

other research institution, or an individual author; state the name of the institute or organization that provided the funding along with the grant number, if applicable.

If no funding was provided for the research, the default statement will be set in place: *None declared*.

### **Data availability**

*Tenside Surfactants Detergents* requires authors to follow our [Data Sharing Policy](#), which must comply with the European GDPR (*General Data Protection Regulation*) rules. Research data should be made widely available to the research community to demonstrate the robustness and validity of the research presented in the journal, to enable and encourage replication of the results, and to allow the community with opportunities to learn.

By publishing in the journal, authors are required to provide a data availability statement (DAS) in their articles. The DAS confirms the presence or absence of shared data. The DAS should include information on where the data supporting the findings reported in the article can be found, including, if applicable, hyperlinks to publicly archived datasets analyzed or generated during the study. If research data are not publicly available, this must be stated in the manuscript, as well as the conditions for accessing the data.

Authors are encouraged to share their data but are not required to do so. The decision to publish will not be affected by whether or not authors share their research data.

The DAS should be included either before the References or in the “[Template for Ethical and Legal Declarations](#)”, which is required for submission.

### **For any further questions please contact:**

Dr. Beatrix Föllner  
(Editor-in-Chief)  
tenside@degruyter.com

Anne Weberling  
(Journal Coordinator at De Gruyter)  
Anne.Weberling@deguyter.com
